# Supplementary material for: Analysis of the interaction between Zinc finger protein 179 (Znf179) and promyelocytic leukemia zinc finger (Plzf)
Source: PubMed Central journal article supplement (PMC3878200; doi:10.1186/1423-0127-20-98), 2013-12-20
Supplement: 1423-0127-20-98-S1.pdf [file 1423-0127-20-98-S1.pdf]

**Table S1.** Primer list for the plasmid construction

| Construct             | Forward Primer (5'-3')             | Reverse Primer (5'-3')              | Template      |
|-----------------------|------------------------------------|-------------------------------------|---------------|
| LexA-Znf179 (1-417)   | ccggaattcATGCCGAGGCCCGTCCT         | cgggatccCTAGCTCAGCACGTCCAAGAT       | IMAGE 4506141 |
| EGFP-Znf179           | gattcgcgagCTATGCCGAGGCCCGTCCTGTCAG | ggtggatccCTATTCTCCTGGAGTAGGGGCTCTCG | IMAGE 4506141 |
| EGFP-Znf179 (1-153)   | gattcgcgagCTATGCCGAGGCCCGTCCTGTCAG | ccggaattcctaGGTCTCCTGCAGTGC         | IMAGE 4506141 |
| EGFP-Znf179 (154-654) | ccggaattcatgTGTGCTGTGAGGGCAGAA     | ggtggatccCTATTCTCCTGGAGTAGGGGCTCTCG | IMAGE 4506141 |
| Flag-Plzf             | cgcggatccgcATGGATCTGACAAAAATG      | ccgctcgagTCACACATAGCACAGG           | IMAGE 4944546 |
| Flag-Plzf (1-398)     | cgcggatccgcATGGATCTGACAAAAATG      | ccgctcgagCGTACTCTGACTTCATGCC        | IMAGE 4944546 |
| Flag-Plzf (180-673)   | cgcggatccATGGTGGACCAGAGCCCT        | ccgctcgagTCACACATAGCACAGG           | IMAGE 4944546 |
| Flag-Plzf (398-673)   | cgcggatccATGAGCCGACCATCGGA         | ccgctcgagTCACACATAGCACAGG           | IMAGE 4944546 |
| Flag-Plzf (455-673)   | cgcggatccATGGCGGGTGCCAAAGCC        | ccgctcgagTCACACATAGCACAGG           | IMAGE 4944546 |
| Flag-Plzf (515-673)   | cgcggatccATGCCAGCTACATCTGC         | ccgctcgagTCACACATAGCACAGG           | IMAGE 4944546 |
